# Supplementary material for: Lipidation-independent vacuolar functions of Atg8 rely on its noncanonical interaction with a vacuole membrane protein
Source: eLife. 2018 Nov 19;7:e41237. doi: 10.7554/eLife.41237 (PMC6279349; doi:10.7554/eLife.41237)
Supplement: Supplementary file 1. [file elife-41237-supp1.xlsx]

## Sheet: Supplementary file 1
	SPBC16E9.02c-YFH purification: the 1st technical replicate of MS analysis			SPBC16E9.02c-YFH purification: the 2nd technical replicate of MS analysis			Atg8-YFH purification: the 1st technical replicate of MS analysis			Atg8-YFH purification: the 2nd technical replicate of MS analysis
Sytematic name	Sequence Count	Spectrum Count	Sequence Coverage	Sequence Count	Spectrum Count	Sequence Coverage	Sequence Count	Spectrum Count	Sequence Coverage	Sequence Count	Spectrum Count	Sequence Coverage	Gene name and Gene product desciption
SPBC32F12.11	36	280	0.747	40	292	0.75	44	993	0.89	45	1050	0.884	|tdh1 |gpd1 |glyceraldehyde-3-phosphate dehydrogenase Tdh1
SPBP8B7.24c	1	2	0.14	0	0	0	30	516	0.719	31	483	0.736	|atg8 | |autophagy associated protein Atg8
SPBC354.12	25	125	0.675	26	126	0.701	32	440	0.701	34	451	0.722	|gpd3 |SPNCRNA.314,SPNG1235 |glyceraldehyde 3-phosphate dehydrogenase Gpd3
SPCC1739.13	55	162	0.669	55	161	0.663	70	459	0.73	69	443	0.717	|ssa2 | |heat shock protein Ssa2 (predicted)
SPAC4H3.10c	42	147	0.676	41	126	0.676	47	416	0.819	46	400	0.743	|pyk1 | |pyruvate kinase (predicted)
SPAC13G7.02c	0	0	0	0	0	0	35	185	0.463	30	171	0.433	|ssa1 | |heat shock protein Ssa1 (predicted)
SPAC3A12.13c	0	0	0	0	0	0	58	159	0.628	55	140	0.628	| | |translation initiation factor eIF3j (p35)
SPBPJ4664.04	0	0	0	0	0	0	69	129	0.566	69	128	0.592	| | |coatomer alpha subunit (predicted)
SPAC513.01c	21	42	0.317	20	37	0.287	50	124	0.625	46	114	0.561	|eft201 |eft2-1,etf2,SPAPYUK71.04c |translation elongation factor 2 (EF-2) Eft2,A
SPCP31B10.07	21	42	0.317	20	37	0.287	50	124	0.625	46	114	0.561	|eft202 | |translation elongation factor 2 (EF-2) Eft2,B
SPCC417.08	29	49	0.359	33	51	0.448	41	75	0.486	40	79	0.469	|tef3 | |translation elongation factor eEF3
SPAC22G7.06c	2	3	0.01	2	3	0.012	40	65	0.25	44	74	0.279	|ura1 | |carbamoyl-phosphate synthase (glutamine hydrolyzing), aspartate carbamoyltransferase Ura1
SPAC23A1.10	24	48	0.539	24	55	0.483	28	88	0.583	27	73	0.563	|tef102 |ef1a-b,ef1a-d,SPBC24E9.15c,tef1-b,tef1-d |translation elongation factor EF-1 alpha Ef1a-b
SPBC839.15c	24	48	0.539	24	55	0.483	28	88	0.583	27	73	0.563	|tef103 |ef1-b,ef1a-c |translation elongation factor EF-1 alpha Ef1a-c
SPCC794.09c	24	48	0.539	24	55	0.483	28	87	0.583	27	73	0.563	|tef101 |ef1a-a,ef1a-e,tef1-e |translation elongation factor EF-1 alpha Ef1a-a
SPBC32H8.12c	24	48	0.56	25	47	0.579	28	69	0.629	28	65	0.691	|act1 |cps8,pi012 |actin Act1
SPBC1709.05	36	80	0.543	32	80	0.54	26	62	0.488	28	63	0.509	|sks2 |hsc1 |heat shock protein, ribosome associated molecular chaperone Sks2
SPBC25H2.02	14	22	0.245	12	20	0.198	30	55	0.458	31	57	0.467	|trs1 |ths1 |cytoplasmic threonine-tRNA ligase Trs1 (predicted)
SPAC4A8.11c	11	16	0.105	14	17	0.11	32	48	0.248	35	54	0.248	|fas2 |lsd1 |fatty acid synthase alpha subunit Lsd1
SPBC16C6.13c	0	0	0	0	0	0	30	54	0.461	27	53	0.367	|sec27 |SPBC244.03 |coatomer beta' subunit (predicted)
SPBC660.16	28	62	0.663	27	58	0.654	29	53	0.665	26	50	0.667	| | |phosphogluconate dehydrogenase, decarboxylating
SPAC19A8.15	4	7	0.115	3	3	0.063	25	49	0.512	24	50	0.465	|trp2 | |tryptophan synthase (predicted)
SPBC17A3.04c	0	0	0	0	0	0	21	43	0.338	24	47	0.347	|rar1 |mes1,mrs1,pi042 |cytoplasmic methionine-tRNA ligase Mrs1 (predicted)
SPAC926.09c	12	16	0.087	19	28	0.131	27	38	0.179	32	47	0.194	|fas1 | |fatty acid synthase beta subunit Fas1
SPBP8B7.03c	4	8	0.16	4	9	0.16	18	39	0.493	19	43	0.468	|rpl402 |rpl4,rpl4-2 |60S ribosomal protein L4 (predicted)
SPAC1006.07	13	23	0.505	14	26	0.526	21	47	0.63	19	40	0.584	| |tif1 |translation initiation factor eIF4A (predicted)
SPCC1795.11	3	3	0.086	4	4	0.124	18	35	0.368	21	37	0.384	|sum3 |ded1,moc2,slh3 |translation initiation RNA helicase Sum3
SPBC337.05c	1	1	0.029	3	4	0.073	18	34	0.386	19	36	0.381	|cct8 | |chaperonin-containing T-complex theta subunit Cct8
SPBC418.01c	0	0	0	0	0	0	18	39	0.401	18	35	0.401	|his4 |SPBC887.20c |imidazoleglycerol-phosphate synthase (predicted)
SPBP8B7.18c	4	6	0.127	4	6	0.127	17	36	0.368	17	34	0.368	| | |phosphomethylpyrimidine kinase (predicted)
SPAC1420.02c	3	4	0.189	3	4	0.189	17	31	0.438	22	34	0.513	|cct5 | |chaperonin-containing T-complex epsilon subunit Cct5
SPAC56E4.04c	3	3	0.029	3	3	0.029	18	30	0.11	22	34	0.143	|cut6 | |acetyl-CoA/biotin carboxylase
SPAC25G10.08	2	3	0.03	1	1	0.018	22	36	0.364	21	33	0.36	| | |translation initiation factor eIF3b (p84)
SPAC17A5.03	0	0	0	3	4	0.067	14	28	0.289	18	33	0.42	|rpl301 |rpl3,rpl3-1 |60S ribosomal protein L3
SPAPB8E5.06c	0	0	0	3	4	0.067	14	28	0.289	18	33	0.42	|rpl302 |rpl3-2,rpl3-b |60S ribosomal protein L3
SPBC1711.06	0	0	0	0	0	0	0	0	0	15	32	0.372	|rpl401 |rpl4,rpl4-1,rpl4-2,rpl402 |60S ribosomal protein L4 (predicted)
SPBC13G1.02	2	2	0.07	6	7	0.196	18	33	0.437	17	31	0.432	|mpg2 | |mannose-1-phosphate guanyltransferase (predicted)
SPBC24C6.05	0	0	0	0	0	0	12	28	0.399	13	31	0.427	|sec28 | |coatomer epsilon subunit (predicted)
SPBC26H8.01	10	21	0.409	9	19	0.393	16	32	0.561	14	30	0.54	|thi2 |nmt2 |thiazole biosynthetic enzyme
SPAC6B12.08	0	0	0	0	0	0	18	34	0.403	16	29	0.421	|mug185 | |Co-chaperone for ATPase activity (predicted)
SPBC215.09c	10	15	0.38	6	10	0.241	16	32	0.519	14	29	0.468	|erg10 | |acetyl-CoA C-acetyltransferase Erg10 (predicted)
SPAC1F7.05	3	5	0.048	1	2	0.018	17	29	0.291	17	29	0.266	|cdc22 | |ribonucleoside reductase large subunit Cdc22
SPBC146.14c	0	0	0	0	0	0	16	27	0.21	14	29	0.21	|sec26 |SPBC337.01c |coatomer beta subunit (predicted)
SPBP35G2.07	1	2	0.027	3	3	0.045	16	27	0.321	17	28	0.321	|ilv1 | |acetolactate synthase catalytic subunit
SPAC57A7.04c	3	5	0.07	4	5	0.084	14	20	0.319	19	28	0.36	|pabp |pab1 |mRNA export shuttling protein
SPCC1906.01	2	3	0.077	4	7	0.157	16	31	0.54	14	27	0.466	|mpg1 | |mannose-1-phosphate guanyltransferase Mpg1
SPBP19A11.03c	3	4	0.053	4	5	0.063	16	25	0.245	20	27	0.29	|mts4 |rpn1 |19S proteasome regulatory subunit Mts4
SPBC1734.11	4	5	0.165	5	6	0.167	14	23	0.378	15	26	0.378	|mas5 | |DNAJ domain protein Mas5 (predicted)
SPBC1A4.08c	1	1	0.038	0	0	0	14	22	0.282	15	26	0.295	|cct3 | |chaperonin-containing T-complex gamma subunit Cct3
SPCC576.10c	1	1	0.031	0	0	0	11	22	0.38	15	25	0.607	|rpt3 | |19S proteasome regulatory subunit Rpt3 (predicted)
SPBC29A3.04	2	3	0.077	2	3	0.077	10	19	0.417	13	25	0.498	|rpl8 |rpl701,rpl7a |60S ribosomal protein L7a/L8 (predicted)
SPAC1D4.04	3	4	0.129	2	3	0.082	17	27	0.385	15	24	0.336	|cct2 | |chaperonin-containing T-complex beta subunit Cct2
SPBC17D11.05	0	0	0	0	0	0	16	25	0.21	14	24	0.162	|tif32 | |translation initiation factor eIF3a
SPAC17G6.14c	4	9	0.085	6	10	0.129	11	21	0.228	12	24	0.256	|uap56 | |ATP-dependent RNA helicase Uap56
SPBC18H10.12c	2	3	0.155	2	5	0.155	9	18	0.454	12	24	0.546	|rpl701 |rpl7,rpl7-1 |60S ribosomal protein L7
SPBC14C8.14c	0	0	0	0	0	0	17	27	0.204	16	23	0.191	|pol5 | |DNA polymerase phi
SPAC4D7.05	1	1	0.03	0	0	0	14	24	0.454	12	22	0.393	|sum1 |tif34 |translation initiation factor eIF3i
SPAC26H5.10c	1	1	0.076	1	2	0.076	11	24	0.656	8	21	0.484	|tif51 | |translation elongation factor eIF5A (predicted)
SPBC646.11	1	1	0.022	1	2	0.022	14	23	0.269	14	21	0.269	|cct6 | |chaperonin-containing T-complex zeta subunit Cct6
SPBC12D12.03	2	2	0.068	1	1	0.047	12	17	0.239	12	21	0.239	|cct1 | |chaperonin-containing T-complex alpha subunit Cct1
SPCC576.11	1	1	0.05	3	4	0.129	12	22	0.478	11	20	0.443	|rpl15 | |60S ribosomal protein L15 (predicted)
SPBC685.07c	0	0	0	1	1	0.081	9	18	0.515	9	20	0.515	|rpl2701 |rpl27-1 |60S ribosomal protein L27
SPBC18H10.03	0	0	0	0	0	0	14	26	0.525	10	19	0.44	|tif35 | |translation initiation factor eIF3g
SPAC12G12.04	2	3	0.053	2	3	0.053	13	24	0.261	11	19	0.229	|mcp60 |hsp60 |mitochondrial heat shock protein Hsp60/Mcp60
SPBC336.10c	1	1	0.071	1	2	0.071	9	20	0.609	10	19	0.562	|tif512 | |translation elongation factor eIF5A (predicted)
SPAC110.04c	9	16	0.139	9	15	0.153	10	16	0.175	11	19	0.175	|pss1 |SPAP14E8.01c,ssp1 |heat shock protein Pss1
SPAC29A4.15	4	7	0.124	8	13	0.202	8	14	0.222	12	19	0.362	| | |cytoplasmic serine-tRNA ligase Srs1 (predicted)
SPAC227.18	2	3	0.109	2	2	0.109	11	21	0.342	12	18	0.375	|lys3 |SPAC2F7.01 |saccharopine dehydrogenase Lys3
SPBC9B6.04c	1	1	0.05	1	1	0.05	12	19	0.385	11	18	0.312	|tuf1 | |mitochondrial translation elongation factor EF-Tu Tuf1
SPCC584.01c	0	0	0	0	0	0	11	17	0.16	14	18	0.213	| | |sulfite reductase NADPH flavoprotein subunit (predicted)
SPCC584.04	0	0	0	0	0	0	10	16	0.193	10	18	0.204	|sup35 |erf3 |translation release factor class II eRF3
SPBC26H8.07c	4	7	0.125	6	9	0.154	8	15	0.194	11	18	0.335	|nda3 |alp12,ben1 |tubulin beta Nda3
SPBC56F2.09c	0	0	0	0	0	0	9	15	0.335	11	18	0.405	|arg5 | |arginine specific carbamoyl-phosphate synthase subunit Arg5 (predicted)
SPBC4.07c	0	0	0	2	2	0.067	9	13	0.362	11	18	0.364	|rpt2 |mts2 |19S proteasome regulatory subunit Rpt2
SPAC926.04c	1	1	0.038	0	0	0	11	20	0.202	12	17	0.214	|hsp90 |git10,swo1 |Hsp90 chaperone
SPAC1F8.07c	9	15	0.171	11	19	0.234	11	19	0.255	10	17	0.194	| | |pyruvate decarboxylase (predicted)
SPAC22H12.04c	1	2	0.056	1	2	0.056	11	15	0.353	11	17	0.353	|rps102 |rps1-2,rps3a-2 |40S ribosomal protein S3a (predicted)
SPAC4G9.09c	0	0	0	0	0	0	10	15	0.11	12	17	0.168	|arg11 | |N-acetyl-gamma-glutamyl-phosphate reductase/acetylglutamate kinase
SPBC16H5.02	36	61	0.411	39	67	0.41	9	14	0.13	10	17	0.142	|pfk1 | |6-phosphofructokinase (predicted)
SPBC23G7.12c	1	1	0.03	2	3	0.074	8	15	0.318	11	16	0.417	|rpt6 |let1 |19S proteasome regulatory subunit Rpt6 (predicted)
SPBC25H2.12c	1	1	0.025	1	1	0.025	8	15	0.17	9	16	0.19	|cct7 | |chaperonin-containing T-complex eta subunit Cct7
SPAC3H5.05c	4	7	0.446	5	8	0.504	6	14	0.583	8	16	0.604	|rps1401 |rps14,rps14-1 |40S ribosomal protein S14 (predicted)
SPBC18H10.13	4	7	0.446	5	8	0.504	6	14	0.583	8	16	0.604	|rps1402 |rps14-2 |40S ribosomal protein S14 (predicted)
SPBC14F5.05c	6	9	0.23	6	10	0.194	8	12	0.243	10	16	0.304	|sam1 | |S-adenosylmethionine synthetase
SPBC1677.03c	2	3	0.08	3	3	0.105	8	11	0.198	11	16	0.247	| | |threonine ammonia-lyase
SPBC16C6.07c	2	4	0.075	1	2	0.041	9	17	0.272	8	15	0.244	|rpt1 | |19S proteasome regulatory subunit Rpt1 (predicted)
SPBC106.06	0	0	0	2	2	0.057	12	17	0.281	9	15	0.224	|cct4 | |chaperonin-containing T-complex delta subunit Cct4
SPAC664.05	1	1	0.058	2	4	0.106	10	15	0.389	9	15	0.389	|rpl13 | |60S ribosomal protein L13 (predicted)
SPCC1322.13	0	0	0	2	2	0.038	10	15	0.197	11	15	0.219	|ade6 |min1 |phosphoribosylaminoimidazole carboxylase Ade6
SPAC4A8.16c	1	2	0.024	0	0	0	11	15	0.163	10	15	0.16	|tif33 |SPAC1E11.01c,SPAC823.01c |translation initiation factor eIF3c
SPAC664.11	21	39	0.366	21	38	0.378	9	14	0.178	9	15	0.211	|ssc1 |ssp1 |mitochondrial heat shock protein Hsp70
SPAC26A3.07c	1	1	0.126	0	0	0	7	13	0.414	6	15	0.362	|rpl1101 |rpl11,rpl11-1 |60S ribosomal protein L11 (predicted)
SPBC17G9.10	1	1	0.126	0	0	0	7	13	0.414	6	15	0.362	|rpl1102 |rpl11-2 |60S ribosomal protein L11 (predicted)
SPAC13G6.02c	0	0	0	0	0	0	8	12	0.294	10	15	0.349	|rps101 |rps1-1,rps3a-1 |40S ribosomal protein S3a
SPCC1840.03	0	0	0	0	0	0	10	17	0.136	9	14	0.106	|sal3 |pse1 |karyopherin Sal3
SPAC1F7.13c	1	1	0.107	1	1	0.107	10	15	0.427	8	14	0.391	|rpl801 |rpk5a,rpl18,rpl2-1,rpl8-1,SPAC21E11.02c |60S ribosomal protein L8 (predicted)
SPBC2F12.07c	1	1	0.107	1	1	0.107	10	15	0.427	8	14	0.391	|rpl802 |rpk37,rpk5b,rpl8-2 |60S ribosomal protein L8 (predicted)
SPBC839.04	1	1	0.107	1	1	0.107	10	15	0.427	8	14	0.391	|rpl803 |rpk5-b,rpkD4,rpl8-3,SPBC24E9.04 |60S ribosomal protein L8 (predicted)
SPCC622.18	0	0	0	0	0	0	7	15	0.333	7	14	0.333	|rpl6 | |60S ribosomal protein L6 (predicted)
SPBC16D10.11c	4	8	0.283	5	9	0.342	7	14	0.408	8	14	0.454	|rps1801 |rps18-1 |40S ribosomal protein S18 (predicted)
SPCC1259.01c	4	8	0.283	5	9	0.342	7	14	0.408	8	14	0.454	|rps1802 |rps18-2,SPCC825.06c |40S ribosomal protein S18 (predicted)
SPBC3B8.03	5	6	0.16	3	4	0.089	8	13	0.287	8	14	0.287	| | |saccharopine dehydrogenase (predicted)
SPCC74.05	0	0	0	0	0	0	7	13	0.419	6	14	0.419	|rpl2702 |rpl27-2 |60S ribosomal protein L27 (predicted)
SPAC23D3.04c	0	0	0	1	1	0.046	6	7	0.182	8	14	0.228	|gpd2 | |glycerol-3-phosphate dehydrogenase Gpd2
SPBC1703.07	0	0	0	0	0	0	9	16	0.189	9	13	0.169	| | |ATP citrate synthase subunit 1 (predicted)
SPBC2G2.04c	4	9	0.321	4	8	0.321	7	13	0.5	7	13	0.426	|mmf1 |pmf1 |YjgF family protein Mmf1
SPCC1183.08c	0	0	0	1	1	0.065	8	10	0.338	8	13	0.31	|rpl101 |rpl1-1,rpl10a-1 |60S ribosomal protein L10a
SPAC328.03	1	1	0.014	1	1	0.019	8	9	0.197	8	13	0.216	|tps1 | |alpha,alpha-trehalose-phosphate synthase
SPAC144.12	1	1	0.099	0	0	0	6	9	0.277	7	13	0.274	| | |ribose 5-phosphate isomerase (predicted)
SPBC16A3.15c	0	0	0	0	0	0	5	9	0.13	7	13	0.18	|nda2 | |tubulin alpha 1
SPAPB17E12.13	0	0	0	0	0	0	5	9	0.251	6	13	0.294	|rpl1802 |rpl18-2 |60S ribosomal protein L18 (predicted)
SPAC22A12.15c	10	15	0.211	10	19	0.196	11	19	0.223	8	12	0.181	|bip1 |bip |ER heat shock protein BiP
SPBC776.11	0	0	0	0	0	0	6	12	0.405	6	12	0.405	|rpl2801 |rpl28-1 |60S ribosomal protein L27/L28
SPBC56F2.02	1	1	0.088	2	2	0.13	5	11	0.264	6	12	0.301	|rpl1901 |rpl19-1 |60S ribosomal protein L19
SPCC1682.14	1	1	0.088	2	2	0.13	5	11	0.264	6	12	0.301	|rpl1902 |rpl19-2 |60S ribosomal protein L19
SPCC5E4.07	0	0	0	0	0	0	6	11	0.405	6	12	0.405	|rpl2802 |rpl28,rpl28-2 |60S ribosomal protein L27/L28
SPBC29B5.03c	0	0	0	0	0	0	6	11	0.349	6	12	0.397	|rpl26 | |60S ribosomal protein L26 (predicted)
SPCC1682.16	2	3	0.054	2	2	0.067	7	10	0.263	8	12	0.26	|rpt4 |SPCC306.01 |19S proteasome regulatory subunit Rpt4 (predicted)
SPCC1223.08c	0	0	0	0	0	0	12	16	0.384	8	11	0.271	|dfr1 | |dihydrofolate reductase/ serine hydrolase family fusion protein Dfr1
SPCC1393.03	3	5	0.32	5	8	0.405	8	14	0.614	7	11	0.614	|rps1501 |rps15-1 |40S ribosomal protein S15 (predicted)
SPAC18G6.14c	1	2	0.062	2	4	0.103	9	14	0.518	5	11	0.323	|rps7 | |40S ribosomal protein S7 (predicted)
SPBC4C3.07	0	0	0	1	1	0.036	7	14	0.281	6	11	0.285	| |csn6 |translation initiation factor eIF3f
SPBP4H10.11c	0	0	0	0	0	0	9	12	0.168	6	11	0.128	|lcf2 | |long-chain-fatty-acid-CoA ligase
SPCC364.03	0	0	0	0	0	0	6	12	0.251	7	11	0.299	|rpl1702 |rpl17,rpl17-2 |60S ribosomal protein L17 (predicted)
SPBC405.07	0	0	0	2	2	0.202	5	11	0.424	5	11	0.424	|rpl3602 |rpl36,rpl36-2 |60S ribosomal protein L36
SPCC970.05	0	0	0	2	2	0.202	5	11	0.424	5	11	0.424	|rpl3601 |rpl36-1 |60S ribosomal protein L36
SPBC18E5.04	2	2	0.086	3	4	0.14	5	10	0.271	7	11	0.348	|rpl1001 |rpl10,rpl10-1 |60S ribosomal protein L10
SPAC23G3.11	0	0	0	0	0	0	6	10	0.173	7	11	0.192	|rpn6 | |19S proteasome regulatory subunit Rpn6 (predicted)
SPCC613.05c	0	0	0	0	0	0	4	9	0.279	5	11	0.279	|rpl35 | |60S ribosomal protein L35
SPAC30C2.04	0	0	0	0	0	0	6	8	0.2	5	11	0.162	| | |cofactor for methionyl-and glutamyl-tRNA synthetases (predicted)
SPAC1687.06c	0	0	0	0	0	0	5	8	0.291	6	11	0.351	|rpl44 |rpl28 |60S ribosomal protein L28/L44 (predicted)
SPAC1071.07c	3	5	0.318	5	8	0.403	8	13	0.61	7	10	0.61	|rps1502 |rps15,rps15-2 |40S ribosomal protein S15 (predicted)
SPBC106.18	0	0	0	1	1	0.092	5	12	0.333	4	10	0.326	|rpl2501 |rpl25a |60S ribosomal protein L25 (predicted)
SPAC17A2.13c	2	2	0.1	0	0	0	8	11	0.356	7	10	0.326	|rad25 | |14-3-3 protein Rad25
SPCC18.14c	2	4	0.074	2	4	0.074	5	10	0.295	4	10	0.183	|rpp0 | |60S acidic ribosomal protein Rpp0 (predicted)
SPBC582.08	1	1	0.026	2	4	0.051	4	10	0.107	4	10	0.107	| | |alanine aminotransferase (predicted)
SPAC26A3.05	1	1	0.016	1	2	0.008	9	10	0.085	7	10	0.068	|chc1 | |clathrin heavy chain Chc1 (predicted)
SPBC1539.07c	0	0	0	1	2	0.032	6	10	0.198	6	10	0.164	|fmd1 | |glutathione-dependent formaldehyde dehydrogenase (predicted)
SPCC24B10.09	2	2	0.152	2	3	0.152	4	9	0.311	5	10	0.477	|rps1702 |rps17,rps17-2 |40S ribosomal protein S17 (predicted)
SPBC839.05c	0	0	0	2	3	0.153	5	9	0.382	5	10	0.382	|rps1701 |rps17-1,SPBC24E9.05c |40S ribosomal protein S17 (predicted)
SPBC32F12.10	2	3	0.07	2	2	0.07	6	9	0.135	7	10	0.181	| | |phosphoglucomutase (predicted)
SPAC3G9.03	1	2	0.094	2	2	0.151	4	9	0.403	4	10	0.403	|rpl2301 |rpl23-1 |60S ribosomal protein L23
SPCC1322.11	1	2	0.094	2	2	0.151	4	9	0.403	4	10	0.403	|rpl2302 |rpl23-2 |60S ribosomal protein L23
SPBPB21E7.07	0	0	0	0	0	0	6	9	0.253	6	10	0.223	|aes1 |SPAPB21E7.07 |enhancer of RNA-mediated gene silencing
SPBC2F12.04	0	0	0	0	0	0	5	9	0.198	7	10	0.31	|rpl1701 |rpl17,rpl17-1,SPCC2F12.04 |60S ribosomal protein L17
SPAC10F6.03c	0	0	0	0	0	0	6	8	0.127	6	10	0.103	|cts1 | |CTP synthase Cts1 (predicted)
SPAP7G5.05	0	0	0	0	0	0	5	8	0.271	7	10	0.348	|rpl1002 |rpl10,rpl10-2 |60S ribosomal protein L10
SPBC4F6.04	0	0	0	1	1	0.092	0	0	0	4	10	0.326	|rpl2502 |rpl23a-2,rpl25b |60S ribosomal protein L25 (predicted)
SPBC11C11.07	0	0	0	0	0	0	0	0	0	5	10	0.262	|rpl1801 |rpl18,rpl18-1 |60S ribosomal protein L18
SPAC821.05	0	0	0	0	0	0	8	15	0.202	5	9	0.16	| | |translation initiation factor eIF3h (p40)
SPAC4F8.14c	3	3	0.132	3	5	0.128	8	12	0.289	7	9	0.224	|hcs1 |hcs |3-hydroxy-3-methylglutaryl-CoA synthase
SPBC119.10	6	8	0.189	2	2	0.068	9	12	0.246	7	9	0.19	|asn1 | |asparagine synthetase
SPAC6G9.09c	1	2	0.047	0	0	0	5	11	0.295	5	9	0.295	|rpl2401 |rpl24,rpl24-01 |60S ribosomal protein L24 (predicted)
SPCC330.14c	1	2	0.047	0	0	0	5	11	0.295	5	9	0.295	|rpl2402 |rpl24-2 |60S ribosomal protein L24 (predicted)
SPCC1682.10	0	0	0	0	0	0	7	11	0.373	7	9	0.373	|rpn8 | |19S proteasome regulatory subunit Rpn8 (predicted)
SPBC18H10.02	11	16	0.231	10	16	0.216	8	10	0.127	6	9	0.098	|lcf1 | |long-chain-fatty-acid-CoA ligase Lcf1
SPAC17A5.15c	0	0	0	0	0	0	6	10	0.134	5	9	0.109	|gus1 |ers1 |cytoplasmic glutamate-tRNA ligase gus1 (predicted)
SPAC24H6.04	3	4	0.122	5	6	0.194	7	9	0.3	7	9	0.236	|hxk1 | |hexokinase 1
SPAC8E11.02c	2	2	0.074	3	7	0.144	5	8	0.244	6	9	0.259	|rad24 |sam4 |14-3-3 protein Rad24
SPCC16C4.13c	0	0	0	0	0	0	2	3	0.188	6	9	0.436	|rpl1201 |rpl12-1,rpl12.1 |60S ribosomal protein L12.1/L12A
SPCC31H12.04c	0	0	0	0	0	0	2	3	0.188	6	9	0.436	|rpl1202 |rpl12,rpl12-2 |60S ribosomal protein L12.1/L12A
SPBC1289.03c	2	4	0.065	4	5	0.148	7	14	0.236	5	8	0.181	|spi1 | |Ran GTPase Spi1
SPAC6F6.07c	1	1	0.079	0	0	0	5	11	0.404	4	8	0.291	|rps13 | |40S ribosomal protein S13
SPBC1685.10	2	4	0.193	2	2	0.277	6	10	0.47	5	8	0.458	|rps27 | |40S ribosomal protein S27 (predicted)
SPAC1071.10c	7	13	0.097	5	13	0.078	5	9	0.072	6	8	0.09	|pma1 | |P-type proton ATPase, P3-type Pma1
SPCC576.08c	3	6	0.138	3	4	0.158	4	9	0.158	4	8	0.158	|rps2 | |40S ribosomal protein S2 (predicted)
SPBC800.05c	0	0	0	0	0	0	4	9	0.094	5	8	0.114	|atb2 |alp2,ban5,tub1 |tubulin alpha 2
SPAC31G5.13	0	0	0	0	0	0	5	9	0.195	5	8	0.159	|rpn11 |bfr2,mts5,pad1,sks1 |19S proteasome regulatory subunit Rpn11
SPBC4F6.18c	4	7	0.194	3	3	0.194	5	8	0.239	5	8	0.239	|arf1 | |ADP-ribosylation factor, Arf family Arf1
SPAC3G9.09c	0	0	0	0	0	0	5	8	0.173	6	8	0.173	|tif211 |eIF2alpha |translation initiation factor eIF2 alpha subunit
SPAC15A10.04c	0	0	0	0	0	0	4	7	0.096	4	8	0.12	|zpr1 | |EF-1 alpha binding zinc finger protein Zpr1 (predicted)
SPAC1805.13	0	0	0	0	0	0	4	7	0.224	5	8	0.284	|rpl14 | |60S ribosomal protein L14 (predicted)
SPAC3C7.08c	0	0	0	0	0	0	6	7	0.083	5	8	0.073	|elf1 | |AAA family ATPase Elf1
SPAC222.08c	0	0	0	0	0	0	2	3	0.132	6	8	0.312	| | |glutamine aminotransferase subunit (predicted)
SPBP22H7.08	1	2	0.088	1	1	0.088	5	11	0.374	4	7	0.32	|rps1002 |pi023,rps10-2,rps10B,SPACTOKYO_453.11 |40S ribosomal protein S10 (predicted)
SPBC26H8.11c	1	1	0.154	1	1	0.154	6	10	0.406	5	7	0.309	| | |conserved fungal protein
SPAC3H5.07	0	0	0	0	0	0	7	10	0.352	3	7	0.14	|rpl702 |rpl7,rpl7-2,rpl7b |60S ribosomal protein L7
SPBC31F10.06c	4	5	0.284	4	5	0.295	6	9	0.405	5	7	0.337	|sar1 | |ADP-ribosylation factor Sar1
SPCC1223.14	1	1	0.033	2	2	0.111	6	9	0.22	5	7	0.195	| |SPCC297.01 |chorismate synthase (predicted)
SPAC31G5.17c	1	2	0.09	1	1	0.09	4	9	0.278	5	7	0.382	|rps1001 |rps10-1 |40S ribosomal protein S10 (predicted)
SPAC8C9.10c	0	0	0	0	0	0	4	9	0.331	4	7	0.331	|rrp14 | |ribosome biogenesis protein Rrp14 (predicted)
SPAC328.10c	1	1	0.074	1	1	0.074	4	8	0.266	4	7	0.296	|rps502 |rps5-2 |40S ribosomal protein S5 (predicted)
SPBC19C2.07	1	1	0.05	1	1	0.05	5	8	0.162	5	7	0.215	|fba1 | |fructose-bisphosphate aldolase Fba1
SPBC16G5.05c	1	1	0.042	0	0	0	6	8	0.248	5	7	0.248	|scs2 | |VAP family protein Scs2
SPBC1D7.04	0	0	0	0	0	0	4	8	0.261	3	7	0.221	|mlo3 | |RNA binding protein Mlo3
SPAC959.07	0	0	0	1	1	0.042	3	7	0.099	4	7	0.141	|rps403 |rps4,rps4-3 |40S ribosomal protein S4 (predicted)
SPBC19F8.08	0	0	0	1	1	0.042	3	7	0.099	4	7	0.141	|rps401 |rps4,rps4-1,SPBC25H2.17c |40S ribosomal protein S4 (predicted)
SPBC21B10.10	0	0	0	1	1	0.042	3	7	0.099	4	7	0.141	|rps402 |rps4-2 |40S ribosomal protein S4 (predicted)
SPBC16C6.11	0	0	0	1	1	0.102	4	7	0.22	4	7	0.22	|rpl3201 |rpl32-1 |60S ribosomal protein L32
SPAC24C9.12c	1	1	0.049	0	0	0	5	7	0.152	6	7	0.173	| | |glycine hydroxymethyltransferase (predicted)
SPBC25H2.05	0	0	0	0	0	0	4	7	0.341	4	7	0.283	|egd2 |nac1,ucp15 |nascent polypeptide-associated complex alpha subunit Egd2
SPBC16G5.14c	5	6	0.213	5	9	0.229	4	5	0.233	4	7	0.229	|rps3 | |40S ribosomal protein S3 (predicted)
SPAC26A3.04	1	1	0.062	1	1	0.062	3	5	0.108	4	7	0.165	|rpl2002 |rpl20,rpl20-2 |60S ribosomal protein L20 (predicted)
SPAC3A12.10	1	1	0.062	1	1	0.062	3	5	0.108	4	7	0.165	|rpl2001 |rpl18a-2,rpl20,rpl20-1,yl17b |60S ribosomal protein L20a (predicted)
SPAC821.11	0	0	0	0	0	0	4	5	0.115	5	7	0.146	|pro1 | |gamma-glutamyl phosphate reductase Pro1 (predicted)
SPAC23A1.11	0	0	0	0	0	0	3	5	0.137	4	7	0.178	|rpl1602 |rpl13a-2,rpl16-2 |60S ribosomal protein L13/L16 (predicted)
SPCC550.14	3	4	0.043	4	5	0.053	3	4	0.029	6	7	0.07	|vgl1 | |vigilin (predicted)
SPAC9E9.09c	2	2	0.062	0	0	0	3	3	0.095	6	7	0.139	|atd1 | |aldehyde dehydrogenase (predicted)
SPBC1A4.02c	0	0	0	0	0	0	2	3	0.081	4	7	0.129	|leu1 |SPBC1E8.07c |3-isopropylmalate dehydrogenase Leu1
SPBC776.09	1	3	0.039	1	2	0.039	1	2	0.039	5	7	0.138	|ste13 | |ATP-dependent RNA helicase Ste13
SPAC8C9.08	1	1	0.074	1	1	0.074	0	0	0	4	7	0.296	|rps5 | |40S ribosomal protein S5 (predicted)
SPCC13B11.01	4	7	0.123	4	7	0.171	6	12	0.214	3	6	0.111	|adh1 |adh |alcohol dehydrogenase Adh1
SPAC22A12.04c	1	1	0.069	1	1	0.069	6	10	0.408	4	6	0.292	|rps2201 |rps15a-1,rps22-1 |40S ribosomal protein S15a (predicted)
SPAC5D6.01	1	1	0.069	1	1	0.069	6	10	0.408	4	6	0.292	|rps2202 |rps15a-2,rps22-2 |40S ribosomal protein S15a (predicted)
SPAC3A11.12c	1	2	0.025	0	0	0	5	10	0.164	3	6	0.1	|rpt5 |pam2,SPAC3H5.01c,tbp1 |19S proteasome regulatory subunit Rpt5 (predicted)
SPBC1539.09c	0	0	0	0	0	0	7	9	0.112	5	6	0.152	|trp1 | |anthranilate synthase component II, multifunctional enzyme (predicted)
SPAC3H5.12c	0	0	0	0	0	0	4	8	0.19	4	6	0.19	|rpl501 |rpl5,rpl5-1 |60S ribosomal protein L5 (predicted)
SPBC11C11.09c	0	0	0	0	0	0	4	8	0.19	4	6	0.19	|rpl502 |rpl5-2,rpl5b |60S ribosomal protein L5
SPCC622.09	5	9	0.413	5	10	0.349	4	7	0.333	3	6	0.278	|htb1 | |histone H2B Htb1
SPAC9E9.03	0	0	0	1	1	0.016	5	7	0.084	4	6	0.062	|leu2 | |3-isopropylmalate dehydratase Leu2 (predicted)
SPBC19C7.06	0	0	0	0	0	0	5	7	0.092	5	6	0.108	|prs1 | |cytoplasmic proline-tRNA ligase Prs1 (predicted)
SPBC337.08c	14	301	0.183	14	296	0.183	2	6	0.047	3	6	0.079	|ubi4 | |ubiquitin
SPAC5H10.01	1	2	0.03	1	2	0.03	4	6	0.163	5	6	0.186	| | |DUF1445 family protein
SPAC664.04c	1	1	0.086	0	0	0	3	6	0.264	3	6	0.264	|rps1602 |rps16,rps16-2 |40S ribosomal protein S16 (predicted)
SPBC18H10.14	1	1	0.086	0	0	0	3	6	0.264	3	6	0.264	|rps1601 |rps16-1 |40S ribosomal protein S16 (predicted)
SPCC1795.05c	0	0	0	0	0	0	3	6	0.225	2	6	0.178	| | |uridylate kinase (predicted)
SPAC11G7.04	14	296	0.547	14	294	0.547	2	5	0.141	3	6	0.234	|ubi1 | |ribosomal-ubiquitin fusion protein Ubi1 (predicted)
SPAC589.10c	14	296	0.467	14	294	0.467	2	5	0.12	3	6	0.2	| | |ribosomal-ubiquitin fusion protein Ubi5 (predicted)
SPAC6G10.11c	14	296	0.467	14	294	0.467	2	5	0.12	3	6	0.2	|ubi3 | |ribosomal-ubiquitin fusion protein Ubi3 (predicted)
SPAC1805.12c	14	295	0.547	14	294	0.547	2	5	0.141	3	6	0.234	|uep1 |ubi2 |ribosomal-ubiquitin fusion protein Ubi2
SPBC16A3.08c	0	0	0	0	0	0	3	5	0.134	4	6	0.162	|oga1 | |Stm1 homolog Oga1
SPAC13G6.07c	0	0	0	0	0	0	3	5	0.146	3	6	0.146	|rps601 |rps6-1 |40S ribosomal protein S6
SPAPB1E7.12	0	0	0	0	0	0	3	5	0.146	3	6	0.146	|rps602 |rps6,rps6-2 |40S ribosomal protein S6 (predicted)
SPBC1105.02c	2	2	0.053	3	4	0.129	2	3	0.053	4	6	0.156	|lys4 | |homocitrate synthase
SPAC1F7.02c	0	0	0	0	0	0	2	3	0.052	4	6	0.081	|has1 | |ATP-dependent RNA helicase Has1 (predicted)
SPAPYUG7.05	0	0	0	0	0	0	4	8	0.117	2	5	0.092	| | |delta-1-pyrroline-5-carboxylate reductase (predicted)
SPBC17D11.07c	0	0	0	0	0	0	6	8	0.09	4	5	0.065	|rpn2 | |19S proteasome regulatory subunit Rpn2 (predicted)
SPBC17G9.03c	1	2	0.024	1	1	0.024	5	6	0.144	4	5	0.083	|krs1 | |cytoplasmic lysine-tRNA ligase Krs1 (predicted)
SPACUNK4.16c	0	0	0	0	0	0	4	6	0.076	4	5	0.085	| | |alpha,alpha-trehalose-phosphate synthase (predicted)
SPBP8B7.06	0	0	0	0	0	0	4	6	0.727	3	5	0.6	|rpp201 |rpa2,rpp2,rpp2-1 |60S acidic ribosomal protein A2
SPAPJ698.02c	1	2	0.042	1	2	0.042	3	5	0.129	2	5	0.087	|rps002 |rps0,rps0-2,rpsa-2 |40S ribosomal protein S0B
SPAC6G10.08	0	0	0	0	0	0	3	5	0.073	3	5	0.084	|idp1 | |isocitrate dehydrogenase Idp1 (predicted)
SPBC800.04c	0	0	0	1	1	0.096	2	4	0.096	3	5	0.181	|rpl4301 |rpl37a-1,rpl43,rpl43-1 |60S ribosomal protein L37a (predicted)
SPBC83.02c	0	0	0	1	1	0.096	2	4	0.096	3	5	0.181	|rpl4302 |rpl37a-2,rpl43,rpl43-2 |60S ribosomal protein L37a (predicted)
SPAC22A12.16	0	0	0	0	0	0	3	4	0.079	4	5	0.142	| | |ATP-citrate synthase subunit 2 (predicted)
SPCC576.09	0	0	0	0	0	0	3	4	0.169	3	5	0.237	|rps20 | |40S ribosomal protein S20 (predicted)
SPBC21C3.13	0	0	0	0	0	0	2	4	0.167	2	5	0.167	|rps1901 |rps19-1 |40S ribosomal protein S19 (predicted)
SPBC649.02	0	0	0	0	0	0	2	4	0.168	2	5	0.168	|rps1902 |rps19,rps19-2 |40S ribosomal protein S19 (predicted)
SPAC23C11.13c	0	0	0	1	1	0.058	3	3	0.16	3	5	0.146	|hpt1 |pur1 |xanthine phosphoribosyltransferase (predicted)
SPBC14F5.06	0	0	0	0	0	0	3	3	0.073	4	5	0.089	|rli1 | |iron-sulfur ATPase involved in ribosome biogenesis and translation Rli1 (predicted)
SPBC365.03c	0	0	0	1	1	0.144	2	2	0.144	3	5	0.194	|rpl2101 |rpl21,rpl21-1 |60S ribosomal protein L21 (predicted)
SPBC685.06	1	2	0.041	1	2	0.041	0	0	0	2	5	0.086	|rps001 |rps0,rps0-1,rpsa-1 |40S ribosomal protein S0A (p40)
SPCC364.07	1	2	0.056	1	1	0.056	4	7	0.155	3	4	0.12	| |SPCC4G3.01 |D-3 phosphoglycerate dehydrogenase (predicted)
SPBC651.01c	0	0	0	0	0	0	4	7	0.076	3	4	0.072	|nog1 |SPBC725.18c |GTP binding protein Nog1 (predicted)
SPAC1834.04	2	3	0.301	1	1	0.066	2	5	0.301	2	4	0.301	|hht1 | |histone H3 h3.1
SPBC1105.11c	2	3	0.301	1	1	0.066	2	5	0.301	2	4	0.301	|hht3 |h3.3 |histone H3 h3.3
SPBC8D2.04	2	3	0.301	1	1	0.066	2	5	0.301	2	4	0.301	|hht2 |h3.2 |histone H3 h3.2
SPAC1F5.10	0	0	0	0	0	0	3	5	0.086	2	4	0.084	| | |ATP-dependent RNA helicase (predicted)
SPAC890.08	2	2	0.204	1	1	0.133	2	4	0.204	2	4	0.204	|rpl31 | |60S ribosomal protein L31 (predicted)
SPAC23C11.02c	0	0	0	0	0	0	3	4	0.336	2	4	0.168	|rps23 | |40S ribosomal protein S23 (predicted)
SPBP4H10.13	0	0	0	0	0	0	3	4	0.336	2	4	0.168	|rps2302 |rps23-2 |40S ribosomal protein S23 (predicted)
SPAC1565.08	18	28	0.34	18	28	0.324	3	3	0.066	4	4	0.056	|cdc48 |dsc6,SPAC6F12.01 |AAA family ATPase involved in ubiquitin-mediated protein degradation Cdc48
SPBC1685.09	0	0	0	3	4	0.375	2	3	0.196	2	4	0.196	|rps29 | |40S ribosomal protein S29 (predicted)
SPAC25G10.06	0	0	0	1	1	0.235	2	3	0.235	3	4	0.235	|rps2801 |rps28-1 |40S ribosomal protein S28 (predicted)
SPCC285.15c	0	0	0	1	1	0.235	2	3	0.235	3	4	0.235	|rps2802 |rps28,rps28-2 |40S ribosomal protein S28, Rps2802
SPAC144.11	1	1	0.059	0	0	0	3	3	0.243	2	4	0.132	|rps1102 |rps11,rps11-2 |40S ribosomal protein S11 (predicted)
SPAC31G5.03	1	1	0.059	0	0	0	3	3	0.243	2	4	0.132	|rps1101 |rps11-1 |40S ribosomal protein S11 (predicted)
SPAC806.04c	0	0	0	0	0	0	2	3	0.059	2	4	0.059	| | |DUF89 family protein
SPAC30D11.06c	0	0	0	0	0	0	1	3	0.031	2	4	0.031	|hfl1 | |Lazarus1 family transmembrane transporter
SPCPB16A4.05c	0	0	0	0	0	0	2	3	0.105	3	4	0.15	| | |urease accessory protein UREG (predicted)
SPAP7G5.02c	0	0	0	0	0	0	1	2	0.019	3	4	0.069	|gua2 | |GMP synthase
SPBC582.07c	0	0	0	0	0	0	2	2	0.066	2	4	0.066	|rpn7 | |19S proteasome regulatory subunit Rpn7
SPAC24H6.07	0	0	0	0	0	0	2	2	0.094	3	4	0.204	|rps901 |rps9-1,rps9a |40S ribosomal protein S9
SPBC29A3.12	0	0	0	0	0	0	2	2	0.094	3	4	0.203	|rps902 |rps9-2,rps9b |40S ribosomal protein S9 (predicted)
SPCC1442.10c	0	0	0	0	0	0	1	2	0.054	2	4	0.118	|rpb3 | |RNA polymerase II subunit 3
SPAC22F8.05	0	0	0	0	0	0	1	1	0.016	3	4	0.044	| | |alpha,alpha-trehalose-phosphate synthase (predicted)
SPBC83.08	0	0	0	0	0	0	1	1	0.024	3	4	0.082	|rvb2 | |AAA family ATPase Rvb2
SPAC4G9.16c	0	0	0	0	0	0	5	7	0.289	2	3	0.1	|rpl901 |rpl9-1 |60S ribosomal protein L9
SPAC1751.03	0	0	0	0	0	0	5	6	0.194	3	3	0.147	| |csn7,csn72,csn7b,SPAC31A2.01 |translation initiation factor eIF3m
SPAPB8E5.09	0	0	0	0	0	0	3	6	0.072	3	3	0.077	|rvb1 | |AAA family ATPase Rvb1
SPCC736.15	4	7	0.16	5	8	0.185	3	5	0.083	3	3	0.083	|pil1 | |eisosome BAR domain protein Pil1
SPBC119.01	0	0	0	0	0	0	5	5	0.093	3	3	0.054	|rpn3 |SPBPJ4664.07 |19S proteasome regulatory subunit Rpn3
SPAPB24D3.08c	0	0	0	0	0	0	2	4	0.083	2	3	0.083	| | |NADP-dependent oxidoreductase (predicted)
SPBC16G5.01	0	0	0	0	0	0	3	4	0.196	2	3	0.152	|rpn12 |mts3,SPBC342.07 |19S proteasome regulatory subunit Rpn12
SPAC926.08c	0	0	0	0	0	0	3	4	0.107	3	3	0.132	| | |Brix domain protein Rpf2 (predicted)
SPAC1834.03c	2	3	0.214	2	4	0.214	1	3	0.117	2	3	0.214	|hhf1 |h4.1 |histone H4 h4.1
SPBC1105.12	2	3	0.214	2	4	0.214	1	3	0.117	2	3	0.214	|hhf3 |h4.3 |histone H4 h4.3
SPBC8D2.03c	2	3	0.214	2	4	0.214	1	3	0.117	2	3	0.214	|hhf2 |ams3,h4.2 |histone H4 h4.2
SPAC30D11.12	1	1	0.108	1	1	0.108	2	3	0.297	2	3	0.297	|rpl3802 |rpl38-2,rps38 |60S ribosomal protein L38 (predicted)
SPCC1620.06c	0	0	0	0	0	0	2	3	0.081	2	3	0.081	| | |ribose-phosphate pyrophosphokinase (predicted)
SPCC1620.08	0	0	0	0	0	0	2	2	0.067	3	3	0.074	| | |succinate-CoA ligase beta subunit (predicted)
SPAC15E1.03	0	0	0	0	0	0	1	2	0.075	2	3	0.085	|rpl42 |rpl36a |60S ribosomal protein L36/L42
SPAC1834.01	0	0	0	0	0	0	1	1	0.028	2	3	0.058	|sup45 | |translation release factor eRF1
SPCC663.04	0	0	0	0	0	0	1	1	0.196	2	3	0.196	|rpl39 | |60S ribosomal protein L39
SPAC694.05c	0	0	0	0	0	0	0	0	0	2	3	0.124	|rps2502 |rps25,rps25-2 |40S ribosomal protein S25 (predicted)
SPBC3D6.15	0	0	0	0	0	0	0	0	0	2	3	0.125	|rps2501 |rps25-1 |40S ribosomal protein S25 (predicted)
SPBC26H8.06	0	0	0	0	0	0	4	5	0.246	2	2	0.139	|grx4 | |glutaredoxin Grx4
SPBC1815.01	0	0	0	1	1	0.052	2	4	0.075	1	2	0.034	|eno101 |eno1 |enolase (predicted)
SPAC1420.03	0	0	0	1	1	0.023	3	4	0.072	2	2	0.052	|rpn501 |rpn5,rpn5-a |19S proteasome regulatory subunit Rpn501
SPAPB8E5.02c	0	0	0	1	1	0.023	3	4	0.072	2	2	0.052	|rpn502 |rpn5,rpn5-b |19S proteasome regulatory subunit Rpn502
SPAC6F12.10c	0	0	0	0	0	0	3	4	0.026	2	2	0.026	|ade3 |min11 |phosphoribosylformylglycinamidine synthase Ade3 (predicted)
SPBC1347.02	0	0	0	0	0	0	3	4	0.086	1	2	0.028	|fkbp39 | |FKBP-type peptidyl-prolyl cis-trans isomerase (predicted)
SPAC222.12c	12	26	0.358	14	27	0.457	2	3	0.063	1	2	0.032	|atp2 | |F1-ATPase beta subunit Atp2
SPBC15D4.05	0	0	0	0	0	0	2	3	0.054	2	2	0.054	| | |conserved CobW/HypB/UreG nucleotide binding domain protein (predicted)
SPBC530.10c	3	4	0.109	2	3	0.075	1	2	0.037	1	2	0.037	|anc1 | |mitochondrial adenine nucleotide carrier Anc1
SPAC11E3.15	1	1	0.077	1	2	0.077	1	2	0.077	1	2	0.077	|rpl22 |SPAP8A3.01 |60S ribosomal protein L22 (predicted)
SPBC30D10.13c	1	1	0.041	1	1	0.041	1	2	0.041	1	2	0.041	|pdb1 |agg1 |pyruvate dehydrogenase e1 component beta subunit Pdb1
SPCC1223.02	1	1	0.064	1	1	0.064	2	2	0.127	2	2	0.098	|nmt1 |thi3 |4-amino-5-hydroxymethyl-2-methylpyrimidine phosphate synthase Nmt1
SPBC16H5.07c	0	0	0	0	0	0	1	2	0.047	2	2	0.056	|ppa2 | |serine/threonine protein phosphatase Ppa2
SPAC13D6.02c	0	0	0	0	0	0	1	2	0.073	1	2	0.073	|byr3 | |translational activator, zf-CCHC type zinc finger protein (predicted)
SPCP31B10.08c	0	0	0	0	0	0	1	2	0.074	1	2	0.074	|rpl35a |rpl33 |60S ribosomal protein L35a
SPCC285.08	0	0	0	0	0	0	1	2	0.05	1	2	0.05	|ret2 | |coatomer delta subunit Ret2 (predicted)
SPAC1071.08	0	0	0	0	0	0	2	2	0.282	2	2	0.327	|rpp203 |rla6,rpa2,rpp2-3 |60S acidic ribosomal protein A2
SPAC8F11.04	0	0	0	0	0	0	1	2	0.043	1	2	0.043	| | |U3 snoRNP-associated protein Cic1/Utp30 family (predicted)
SPBC29A3.16	0	0	0	0	0	0	1	2	0.108	1	2	0.108	|rrs1 | |ribosome biogenesis protein Rrs1 (predicted)
SPBC9B6.08	0	0	0	0	0	0	2	2	0.087	1	2	0.057	|clc1 | |clathrin light chain
SPAC1834.02	3	6	0.029	3	5	0.029	1	1	0.01	2	2	0.013	|aro1 | |pentafunctional aromatic polypeptide Aro1 (predicted)
SPAC27E2.03c	0	0	0	1	1	0.051	1	1	0.028	2	2	0.066	| | |Obg-Like ATPase (predicted)
SPBC1685.02c	0	0	0	1	1	0.061	1	1	0.061	1	2	0.061	|rps1202 |rps12-2 |40S ribosomal protein S12 (predicted)
SPCC962.04	0	0	0	1	1	0.062	1	1	0.062	1	2	0.062	|rps1201 |rps12,rps12-1 |40S ribosomal protein S12 (predicted)
SPBC18E5.06	0	0	0	0	0	0	1	1	0.184	2	2	0.31	|rps21 | |40S ribosomal protein S21
SPBC23E6.10c	0	0	0	0	0	0	1	1	0.025	1	2	0.036	| | |methylthioribose-1-phosphate isomerase (predicted)
SPCC1183.07	0	0	0	0	0	0	1	1	0.007	2	2	0.012	| | |U3 snoRNP-associated protein Rrp5 (predicted)
SPAC1039.07c	0	0	0	0	0	0	1	1	0.067	1	2	0.067	| | |aminotransferase class-III, possible transaminase, unknown specificity
SPAC9.07c	0	0	0	0	0	0	1	1	0.038	1	2	0.038	| | |GTPase Rbg1 (predicted)
SPAC9G1.03c	0	0	0	0	0	0	1	1	0.174	2	2	0.284	|rpl3001 |rpl30,rpl30-1 |60S ribosomal protein L30 (predicted)
SPAC23C4.15	1	1	0.043	1	1	0.043	0	0	0	1	2	0.043	|rpb5 | |DNA-directed RNA polymerase I, II and III subunit Rpb5
SPBC11C11.06c	1	1	0.118	1	1	0.118	0	0	0	2	2	0.18	| | |sequence orphan
SPAC30C2.08	0	0	0	0	0	0	0	0	0	1	2	0.018	| | |conserved fungal protein
SPAC26F1.03	0	0	0	0	0	0	0	0	0	1	2	0.022	|pda1 | |pyruvate dehydrogenase e1 component alpha subunit Pda1 (predicted)
SPBC215.15	0	0	0	0	0	0	0	0	0	2	2	0.125	|sec13 | |COPII-coated vesicle component Sec13
SPAC23C4.08	0	0	0	0	0	0	0	0	0	1	2	0.054	|rho3 | |Rho family GTPase Rho3
SPAC2F3.09	0	0	0	0	0	0	0	0	0	2	2	0.043	|hem1 | |5-aminolevulinate synthase Hem1 (predicted)
SPCC1827.05c	0	0	0	0	0	0	0	0	0	1	2	0.033	| | |nucleolar RNA-binding protein NIFK (predicted)
SPAC3A12.07	0	0	0	0	0	0	3	4	0.268	1	1	0.089	|rpb11 | |RNA polymerase II complex subunit Rpb11
SPBC16G5.11c	0	0	0	0	0	0	2	3	0.19	1	1	0.138	|bag101 |bag1,bag1-a |BAG family molecular chaperone regulator Bag101 (predicted)
SPBC4F6.13c	0	0	0	0	0	0	2	3	0.032	1	1	0.02	| | |WD repeat/BOP1NT protein (predicted)
SPAC607.03c	1	1	0.192	1	1	0.192	2	2	0.416	1	1	0.192	|snu13 | |U3 snoRNP-associated protein Snu13
SPCC1450.07c	0	0	0	0	0	0	2	2	0.069	1	1	0.034	|dao1 | |D-amino acid oxidase
SPCC162.02c	0	0	0	0	0	0	1	2	0.011	1	1	0.011	| | |AMP-binding dehydrogenase (predicted)
SPCC1235.02	0	0	0	0	0	0	1	2	0.033	1	1	0.033	|bio2 |SPCC320.01c |biotin synthase
SPCC1494.05c	0	0	0	0	0	0	2	2	0.04	1	1	0.009	|ubp12 | |CSN-associated deubiquitinating enzyme Ubp12
SPAC17H9.12c	0	0	0	0	0	0	2	2	0.192	1	1	0.113	| | |mitochondrial cytochrome c-heme linkage protein Cyc2 (predicted)
SPAC890.04c	0	0	0	0	0	0	1	2	0.023	1	1	0.023	| | |ribosome biogenesis protein Ytm1 (predicted)
SPAC23H4.10c	0	0	0	0	0	0	2	2	0.048	1	1	0.025	|thi4 | |bifunctional thiamine-phosphate dipyrophosphorylase/hydroxyethylthiazole kinase
SPAC664.06	0	0	0	0	0	0	1	2	0.084	1	1	0.084	|rlp7 |rpl7,rpl7-3,rpl703 |ribosomal protein L7-like Rlp7 involved in ribosome biogenesis (predicted)
SPBC646.10c	0	0	0	0	0	0	1	2	0.022	1	1	0.022	| | |U3 snoRNP protein Nop56 (predicted)
SPCC1919.09	0	0	0	0	0	0	1	2	0.053	1	1	0.053	|tif6 | |translation initiation factor eIF6
SPAC644.15	1	2	0.147	1	3	0.147	1	1	0.147	1	1	0.147	|rpp101 |rpa1,rpp1-1 |60S acidic ribosomal protein A1
SPBC3B9.13c	1	2	0.145	1	3	0.145	1	1	0.145	1	1	0.145	|rpp102 |rpa103,rpp1-2 |60S acidic ribosomal protein A3
SPBC839.16	1	1	0.014	1	1	0.014	1	1	0.013	1	1	0.007	| | |C1-5,6,7,8-tetrahydrofolate (THF) synthase, trifunctional enzyme
SPAC23H4.06	1	1	0.078	1	1	0.078	1	1	0.078	1	1	0.078	|gln1 | |glutamate-ammonia ligase Gln1
SPAC57A7.10c	1	1	0.032	0	0	0	1	1	0.013	1	1	0.034	|sec21 | |coatomer gamma subunit Sec21 (predicted)
SPAC637.07	0	0	0	0	0	0	1	1	0.039	1	1	0.026	|moe1 | |translation initiation factor eIF3d Moe1
SPCC645.08c	0	0	0	0	0	0	1	1	0.028	1	1	0.028	|snd1 | |RNA-binding protein Snd1
SPAC4D7.08c	0	0	0	0	0	0	1	1	0.051	1	1	0.051	|ade4 |aza1,min13 |amidophosphoribosyltransferase Ade4
SPAC11D3.02c	0	0	0	0	0	0	1	1	0.067	1	1	0.067	| | |ELLA family acetyltransferase (predicted)
SPAC6G9.08	0	0	0	0	0	0	1	1	0.015	1	1	0.015	|ubp6 | |ubiquitin C-terminal hydrolase Ubp6
SPAC7D4.07c	0	0	0	0	0	0	1	1	0.107	1	1	0.243	|trx1 |trx2 |cytosolic thioredoxin Trx1
SPBC11B10.09	0	0	0	0	0	0	1	1	0.081	1	1	0.081	|cdc2 |cdk1,pi002,SPACTOKYO_453.34,swo2,tws1,wee2 |cyclin-dependent protein kinase Cdk1/Cdc2
SPBC14F5.03c	0	0	0	0	0	0	1	1	0.015	1	1	0.015	|kap123 | |karyopherin Kap123
SPBC646.09c	0	0	0	0	0	0	1	1	0.062	1	1	0.062	|int6 |yin6 |eIF3e subunit Int6
SPBC660.11	0	0	0	0	0	0	1	1	0.034	1	1	0.034	|tcg1 |mug187 |AP endonuclease Apn1
SPAC959.08	0	0	0	0	0	0	1	1	0.194	1	1	0.194	|rpl2102 |rpl21,rpl21-2 |60S ribosomal protein L21 (predicted)
SPAC17G6.13	0	0	0	0	0	0	1	1	0.023	1	1	0.023	|slt1 | |sequence orphan Slt1
SPAC23H3.10	0	0	0	0	0	0	1	1	0.056	1	1	0.056	|ssr2 | |SWI/SNF and RSC complex subunit Ssr2
SPAC2E1P3.04	0	0	0	0	0	0	1	1	0.013	1	1	0.063	|cao1 |spao1 |copper amine oxidase Cao1
SPAC607.05	0	0	0	0	0	0	1	1	0.047	1	1	0.047	|rpn9 | |19S proteasome regulatory subunit Rpn9
SPCC1672.02c	1	1	0.051	2	3	0.083	0	0	0	1	1	0.051	|sap1 | |switch-activating protein Sap1
SPAC19G12.06c	0	0	0	2	2	0.176	0	0	0	1	1	0.176	|hta2 | |histone H2A beta
SPCC622.08c	0	0	0	2	2	0.174	0	0	0	1	1	0.174	|hta1 | |histone H2A alpha
SPAC29B12.01	0	0	0	1	1	0.014	0	0	0	1	1	0.014	|ino80 |SPAC3G6.12 |SNF2 family helicase Ino80
SPBC14F5.04c	0	0	0	1	1	0.043	0	0	0	1	1	0.017	|pgk1 | |phosphoglycerate kinase Pgk1 (predicted)
SPCC1442.09	0	0	0	0	0	0	0	0	0	1	1	0.078	|trp3 | |anthranilate synthase component I (predicted)
SPBC1711.08	0	0	0	0	0	0	0	0	0	1	1	0.033	| | |chaperone activator Aha1 (predicted)
SPAC13G6.11c	0	0	0	0	0	0	0	0	0	1	1	0.042	|erg12 | |mevalonate kinase Erg12 (predicted)
SPAC17C9.03	0	0	0	0	0	0	0	0	0	1	1	0.008	|tif471 | |translation initiation factor eIF4G
SPAC6F12.14	0	0	0	0	0	0	0	0	0	1	1	0.023	|cut23 |apc8 |anaphase-promoting complex subunit Apc8
SPCC16A11.17	0	0	0	0	0	0	0	0	0	1	1	0.02	|mcm4 |cdc21,SPCC24B10.01 |MCM complex subunit Mcm4/Cdc21
SPAC110.03	0	0	0	0	0	0	0	0	0	1	1	0.068	|cdc42 | |Rho family GTPase Cdc42
SPAC17G6.10	0	0	0	0	0	0	0	0	0	1	1	0.044	|ssr1 | |SWI/SNF and RSC complex subunit Ssr1
SPAC1805.11c	0	0	0	0	0	0	0	0	0	1	1	0.076	|rps2602 |rps26-2 |40S ribosomal protein S26 (predicted)
SPAC1952.11c	0	0	0	0	0	0	0	0	0	1	1	0.014	|ure2 | |urease Ure2
SPAC23A1.08c	0	0	0	0	0	0	0	0	0	1	1	0.062	|rpl3401 |rpl34,rpl34-1 |60S ribosomal protein L34
SPAC29A4.10	0	0	0	0	0	0	0	0	0	1	1	0.04	|rrn5 | |RNA polymerase I upstream activation factor complex subunit Rrn5
SPAC630.05	0	0	0	0	0	0	0	0	0	1	1	0.031	|gyp7 | |GTPase activating protein Gyp7 (predicted)
SPAC6B12.10c	0	0	0	0	0	0	0	0	0	1	1	0.018	|spp1 |pri1 |DNA primase catalytic subunit Spp1
SPAC806.03c	0	0	0	0	0	0	0	0	0	1	1	0.075	|rps2601 |rps26,rps26-1 |40S ribosomal protein S26 (predicted)
SPAPB17E12.05	0	0	0	0	0	0	0	0	0	1	1	0.135	|rpl3703 |rpl37 |60S ribosomal protein L37 (predicted)
SPBC1778.02	0	0	0	0	0	0	0	0	0	1	1	0.02	|rap1 | |telomere binding protein Rap1
SPBC83.15	0	0	0	0	0	0	0	0	0	1	1	0.028	| | |ribosome biogenesis protein Nsa1 (predicted)
SPCC1223.05c	0	0	0	0	0	0	0	0	0	1	1	0.132	|rpl3702 |rpl37,rpl37-2 |60S ribosomal protein L37 (predicted)
SPCC1322.15	0	0	0	0	0	0	0	0	0	1	1	0.063	|rpl3402 |rpl34,rpl34-2 |60S ribosomal protein L34
SPCC16A11.16c	0	0	0	0	0	0	0	0	0	1	1	0.031	|rpn1302 |rpn13,rpn13b |19S proteasome regulatory subunit Rpn13b
SPCC24B10.08c	0	0	0	0	0	0	0	0	0	1	1	0.08	|ada2 | |SAGA complex subunit Ada2
SPCC622.14	0	0	0	0	0	0	0	0	0	1	1	0.034	| | |GTPase activating protein (predicted)
SPCC757.09c	0	0	0	0	0	0	0	0	0	1	1	0.04	|rnc1 | |RNA-binding protein that suppresses calcineurin deletion Rnc1
SPCP1E11.11	0	0	0	0	0	0	0	0	0	1	1	0.012	|puf6 | |Puf family RNA-binding protein Puf6 (predicted)
SPAC3G9.08	0	0	0	0	0	0	3	4	0.113	0	0	0	|png1 | |ING family homolog Png1
SPAC922.07c	0	0	0	0	0	0	3	3	0.083	0	0	0	|atd2 | |aldehyde dehydrogenase (predicted)
SPBC19F5.05c	0	0	0	0	0	0	1	3	0.021	0	0	0	|ppp1 |SPBC25D12.01c |pescadillo-family BRCT domain protein Ppp1 (predicted)
SPAC3F10.03	0	0	0	1	2	0.02	2	2	0.046	0	0	0	|grs1 | |mitochondrial and cytoplasmic glycine-tRNA ligase Grs1 (predicted)
SPAC17C9.12	0	0	0	0	0	0	2	2	0.056	0	0	0	|scs22 | |VAP family protein Scs22
SPAC23C11.09	0	0	0	0	0	0	2	2	0.062	0	0	0	|ala1 |ars1 |mitochondrial and cytoplasmic alanine-tRNA ligase Ala1 (predicted)
SPAC17C9.01c	0	0	0	0	0	0	1	2	0.027	0	0	0	|nuc2 |apc3,SPAC1851.01 |anaphase-promoting complex subunit Apc3
SPAC19B12.04	0	0	0	0	0	0	1	2	0.115	0	0	0	|rps3001 |rps30-1 |40S ribosomal protein S30 (predicted)
SPBC19G7.03c	0	0	0	0	0	0	1	2	0.115	0	0	0	|rps3002 |rps30,rps30-2,ysprs30 |40S ribosomal protein S30 (predicted)
SPAC23C11.11	3	4	0.16	3	4	0.127	1	1	0.039	0	0	0	|cka1 |orb5 |serine/threonine protein kinase Cka1
SPAC1F7.04	1	1	0.084	1	2	0.084	1	1	0.084	0	0	0	|rho1 | |Rho family GTPase Rho1
SPBC660.07	0	0	0	0	0	0	1	1	0.012	0	0	0	|ntp1 | |alpha,alpha-trehalase Ntp1
SPBC12C2.11	0	0	0	0	0	0	1	1	0.013	0	0	0	| |SPBC21D10.02 |glutamine-fructose-6-phosphate transaminase (predicted)
SPBC6B1.08c	0	0	0	0	0	0	1	1	0.021	0	0	0	|ofd1 | |2-oxoglutarate and Fe(II) dioxygenase domain containing protein 1
SPAC17H9.05	0	0	0	0	0	0	1	1	0.042	0	0	0	|ebp2 | |rRNA processing protein Ebp2 (predicted)
SPAC56F8.03	0	0	0	0	0	0	1	1	0.021	0	0	0	| | |translation initiation factor IF2 (predicted)
SPBC119.15	0	0	0	0	0	0	1	1	0.038	0	0	0	| | |AAA family ATPase at the interface between RNA polymerase II and chaperone (predicted)
SPBC17G9.07	0	0	0	0	0	0	1	1	0.067	0	0	0	|rps2402 |rps24-2 |40S ribosomal protein S24 (predicted)
SPBC19F5.04	0	0	0	0	0	0	1	1	0.033	0	0	0	| | |aspartate kinase (predicted)
SPBC27.08c	0	0	0	0	0	0	1	1	0.024	0	0	0	|sua1 |asp1,met3,SPBC28F2.01c |sulfate adenylyltransferase
SPBC3B9.19	0	0	0	0	0	0	1	1	0.031	0	0	0	|mge1 | |mitochondrial GrpE domain chaperone protein (predicted)
SPBC56F2.03	0	0	0	0	0	0	1	1	0.053	0	0	0	| | |actin-like protein Arp10 (predicted)
SPCC1827.06c	0	0	0	0	0	0	1	1	0.056	0	0	0	| | |aspartate semialdehyde dehydrogenase (predicted)
SPCC364.06	0	0	0	0	0	0	1	1	0.036	0	0	0	|nap1 |nap11 |nucleosome assembly protein Nap1
SPBC16E9.02c	225	1452	0.817	220	1307	0.826	0	0	0	0	0	0	| | |CUE domain protein
SPAPJ696.02	16	33	0.409	16	34	0.405	0	0	0	0	0	0	| | |actin cortical patch component Lsb4 (predicted)
SPAC14C4.14	5	7	0.106	5	7	0.121	0	0	0	0	0	0	|atp1 | |F1-ATPase alpha subunit
SPAC1783.08c	1	1	0.05	3	4	0.129	0	0	0	0	0	0	|rpl1502 |rpl15-2 |60S ribosomal protein L15b (predicted)
SPAC24C9.08	1	1	0.039	3	4	0.077	0	0	0	0	0	0	| | |vacuolar carboxypeptidase (predicted)
SPAC1002.19	1	3	0.034	2	3	0.148	0	0	0	0	0	0	|urg1 | |GTP cyclohydrolase II Urg1 (predicted)
SPAC3A11.10c	2	2	0.093	2	3	0.073	0	0	0	0	0	0	| | |dipeptidyl peptidase (predicted)
SPAC1851.03	1	1	0.121	2	3	0.165	0	0	0	0	0	0	|ckb1 | |CK2 family regulatory subunit Ckb1
SPBC2G5.06c	1	1	0.048	2	3	0.072	0	0	0	0	0	0	|hmt2 |cad1 |sulfide-quinone oxidoreductase
SPAC24H6.13	1	2	0.016	1	2	0.016	0	0	0	0	0	0	| | |DUF221 family protein implicated in Golgi to plasma membrane transport (predicted)
SPBC13A2.04c	1	2	0.021	1	2	0.021	0	0	0	0	0	0	|ptr2 | |PTR family peptide transporter Ptr2
SPCC1235.15	1	2	0.035	1	2	0.035	0	0	0	0	0	0	|dga1 |SPCC548.01 |diacylglycerol O-acyltransferase Dga1
SPBC1685.13	1	1	0.093	2	2	0.093	0	0	0	0	0	0	|fhn1 | |Fhn1 plasma membrane organization protein
SPBC3D6.02	1	1	0.062	1	2	0.062	0	0	0	0	0	0	|but2 | |But2 family protein But2
SPCPB1C11.03	1	1	0.019	2	2	0.044	0	0	0	0	0	0	| | |cysteine transporter (predicted)
SPBC83.16c	0	0	0	1	2	0.021	0	0	0	0	0	0	| | |conserved eukaryotic protein
SPBC29B5.02c	2	3	0.048	1	1	0.033	0	0	0	0	0	0	|isp4 | |OPT oligopeptide transporter family Isp4
SPBC2G5.02c	1	2	0.11	1	1	0.11	0	0	0	0	0	0	|ckb2 | |CK2 family regulatory subunit (predicted)
SPBC8E4.01c	1	2	0.026	1	1	0.021	0	0	0	0	0	0	| |SPBP4G3.01 |inorganic phosphate transporter (predicted)
SPBC530.07c	1	1	0.095	1	1	0.095	0	0	0	0	0	0	| | |TENA/THI family protein
SPAC3H5.10	0	0	0	1	1	0.102	0	0	0	0	0	0	|rpl3202 |rpl32,rpl32-2 |60S ribosomal protein L32 (predicted)
SPBC56F2.12	0	0	0	1	1	0.037	0	0	0	0	0	0	|ilv5 | |acetohydroxyacid reductoisomerase (predicted)
SPBC30D10.18c	0	0	0	1	1	0.065	0	0	0	0	0	0	|rpl102 |rpl1-2,rpl10a-2 |60S ribosomal protein L10a
SPAC15A10.16	0	0	0	1	1	0.013	0	0	0	0	0	0	|bud6 |aip3,fat1,SPAC15E1.01 |actin interacting protein 3 homolog Bud6
SPAC1B3.16c	0	0	0	1	1	0.018	0	0	0	0	0	0	|vht1 | |vitamin H transporter Vth1
SPAC23C11.03	0	0	0	1	1	0.067	0	0	0	0	0	0	| | |U3 snoRNP-associated protein Mpp1 (predicted)
SPAC26A3.16	0	0	0	1	1	0.031	0	0	0	0	0	0	|dph1 |ucp5 |UBA domain protein Dph1
SPAC4G9.15	0	0	0	1	1	0.029	0	0	0	0	0	0	| | |ketoreductase (predicted)
SPAP32A8.03c	0	0	0	1	1	0.019	0	0	0	0	0	0	| | |ubiquitin-protein ligase E3 (predicted)
SPBC16C6.02c	0	0	0	1	1	0.006	0	0	0	0	0	0	|vps1302 |vps13b |chorein homolog (predicted)
SPBC1E8.05	0	0	0	1	1	0.139	0	0	0	0	0	0	| | |conserved fungal protein
SPBC365.14c	0	0	0	1	1	0.034	0	0	0	0	0	0	|uge1 |gal10 |UDP-glucose 4-epimerase Uge1
SPCC1672.03c	0	0	0	1	1	0.034	0	0	0	0	0	0	| | |guanine deaminase (predicted)
SPAC6F12.13c	1	2	0.037	0	0	0	0	0	0	0	0	0	|fps1 | |geranyltranstransferase Fps1
SPAC16C9.05	2	2	0.069	0	0	0	0	0	0	0	0	0	|cph1 | |Clr6 histone deacetylase associated PHD protein-1 Cph1
SPBC1604.07	1	2	0.061	0	0	0	0	0	0	0	0	0	|atp4 | |F0-ATPase subunit (predicted)
SPAC22E12.11c	1	1	0.015	0	0	0	0	0	0	0	0	0	|set3 | |histone lysine methyltransferase Set3
SPAC27E2.02	1	1	0.046	0	0	0	0	0	0	0	0	0	| | |IMPACT homolog, translational regulator (predicted)
SPAC29A4.18	1	1	0.046	0	0	0	0	0	0	0	0	0	|prw1 | |Clr6 histone deacetylase complex subunit Prw1
SPAC9.03c	1	1	0.017	0	0	0	0	0	0	0	0	0	|brr2 |spp41 |U5 snRNP complex subunit Brr2
SPACUNK4.17	1	1	0.052	0	0	0	0	0	0	0	0	0	| | |NAD binding dehydrogenase family protein
SPBC12C2.10c	1	1	0.021	0	0	0	0	0	0	0	0	0	|pst1 |SPBC21D10.01c |Clr6 histone deacetylase complex subunit Pst1
SPBC36.05c	1	1	0.049	0	0	0	0	0	0	0	0	0	|clr6 | |histone deacetylase (class I) Clr6
SPBC713.12	1	1	0.033	0	0	0	0	0	0	0	0	0	|erg1 | |squalene monooxygenase Erg1 (predicted)
SPCC548.06c	1	1	0.026	0	0	0	0	0	0	0	0	0	|ght8 | |hexose transporter Ght8 (predicted)
SPCC548.07c	1	1	0.025	0	0	0	0	0	0	0	0	0	|ght1 | |hexose transporter Ght1
